# Supplementary material for: Genital and Oral Microbiome and Behçet’s Disease Activity
Source: Research Square preprint supplement (doi:10.21203/rs.3.rs-1208933/v1), 2022-01-03
Supplement: Supplementary file 1 [file 2af17d9f13a3dafa2ebba274.docx]

Table S1: Effect of systemic medication and clinical outcomes on genital area based on V1/V2 and V3/V4.

| **Systemic medication and clinical outcomes** | P value (V1/V2) | P value (V3/V4) |
| --- | --- | --- |
| Azathioprine | 0.058 | Not significant |
| Mycophenolate mofetil | Not significant | 0.07 |
| Colchicine | 0.020 * | 0.003* |
| Work and Social Adjustment Scale (**WSAS**) | 0.004 * | 0.012* |
| Gender | Not significant | 0.001* |

In genital area samples, Colchicine has a significant effect on the microbial abundance (V1/V2; P= 0.020, V3/V4; P= 0.003), patients with high WSAS scores were their bacteria abundance significantly different compared to WSAS low score group (V1/V2; P= 0.004, V3/V4; P= 0.012), and only V3/V4 data showed that gender was a factor that show a significant impact on bacteria abundance in this study.

* Indicates P ≤ 0.05.
