# Supplementary figures and images for: Genital and Oral Microbiome and Behçet’s Disease Activity
Source: Research Square preprint supplement (doi:10.21203/rs.3.rs-1208933/v1), 2022-01-03

V1/V2

**
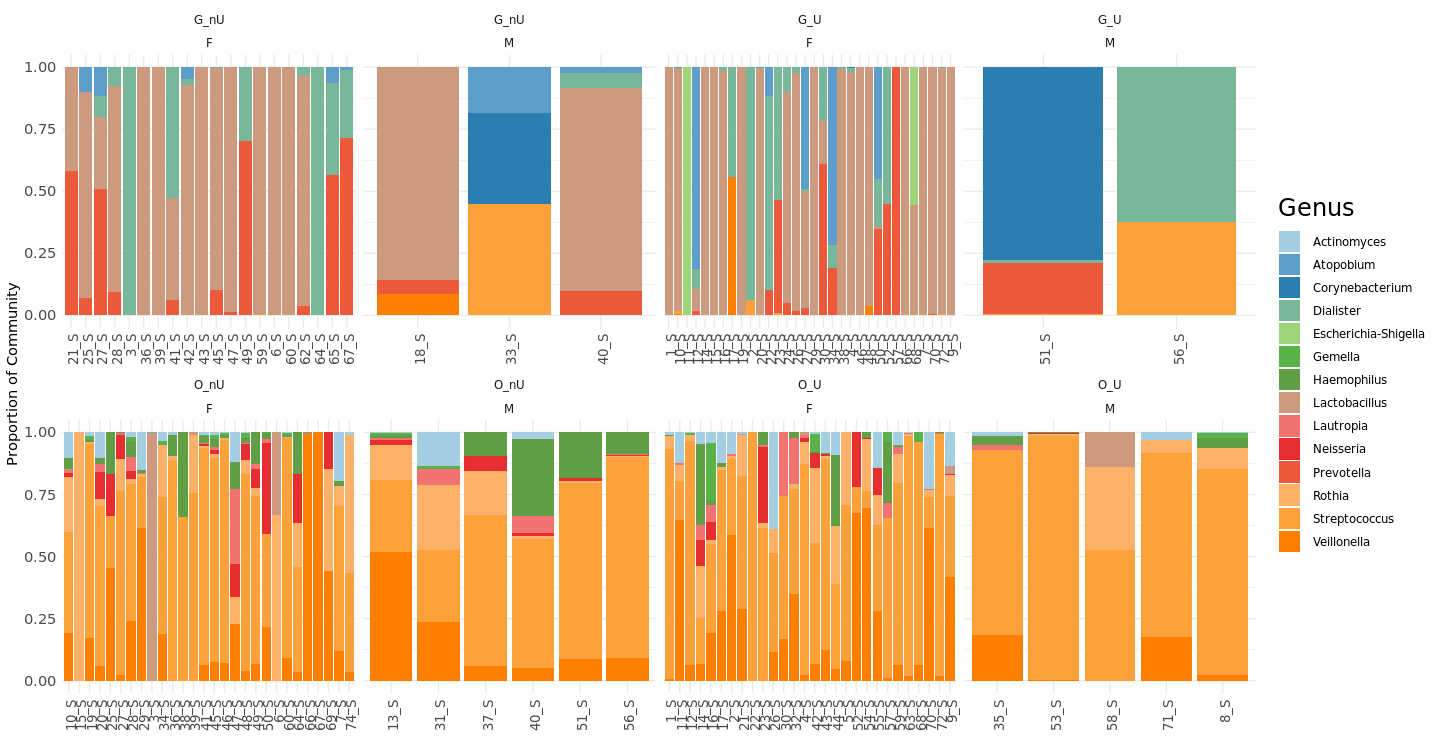
**

V3/V4

**
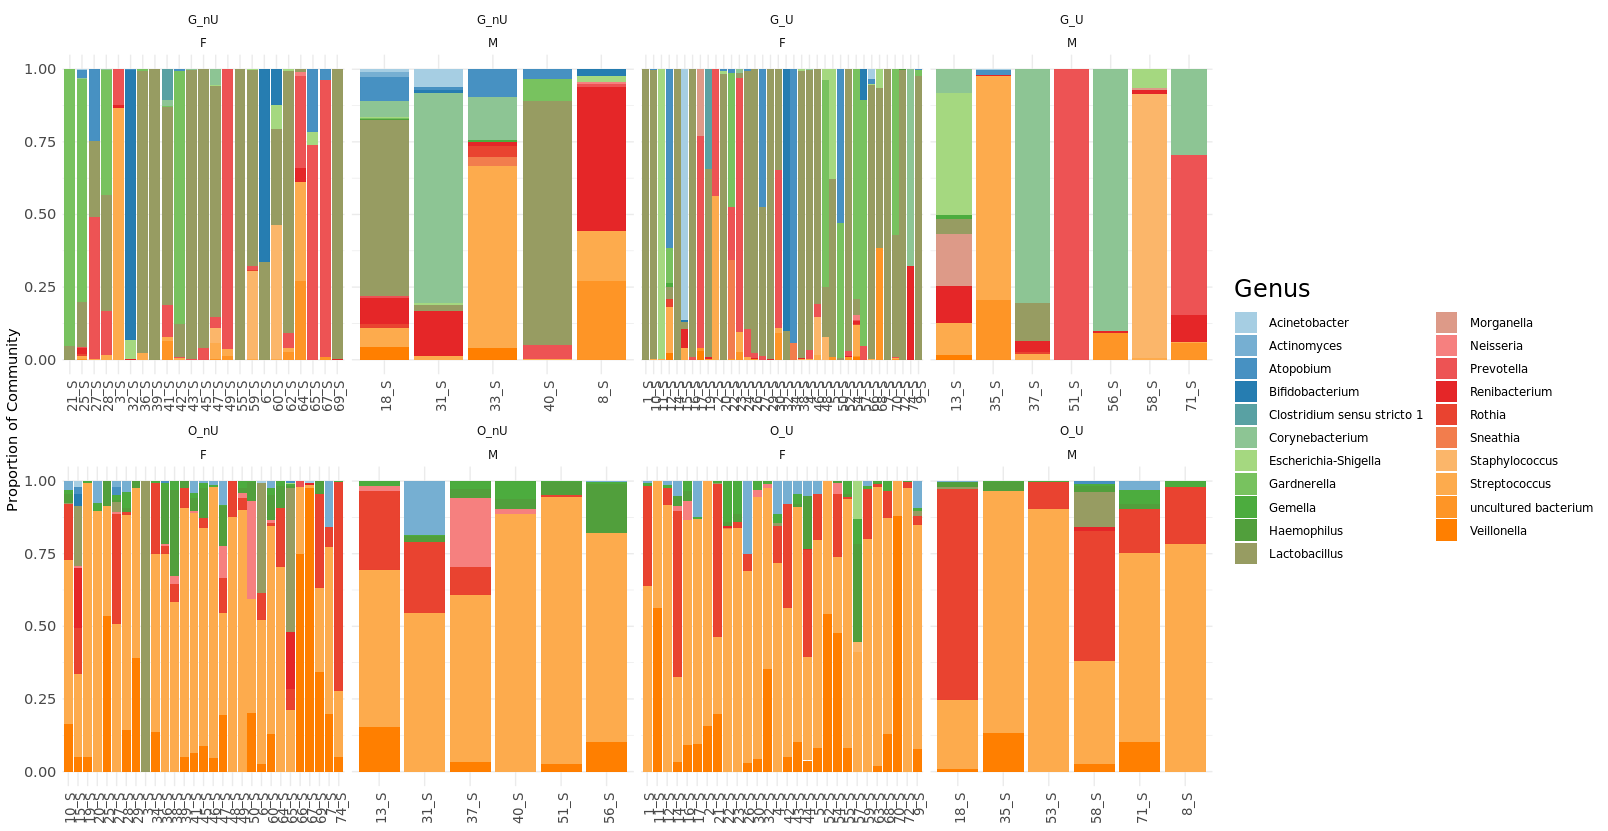
**

Figure S1: gender and bacteria relevant abundance in oral and genital area of BD patients.

Supplement: Supplementary file 2 [file af2a5a2b0287b49c13606397.docx]
